# Supplementary material
Source: HighWire-hosted journal article supplement (http://thorax.bmjjournals.com/highwire/filestream/173891/field_highwire_adjunct_files/0/628684webonlyapp1.pdf)
Supplement: 628684webonlyapp1.pdf [file 628684webonlyapp1.pdf]

## **Supplementary data**

### **Ventilation heterogeneity is a major determinant of airway hyperresponsiveness in asthma, independent of airway inflammation**

Sue R Downie<sup>1,2,3</sup> BSc, Cheryl M Salome<sup>1,2,3</sup> PhD, Sylvia Verbanck<sup>4</sup> PhD, Bruce Thompson<sup>5</sup> PhD, Norbert Berend<sup>1,2,3,6</sup> MBBS MD and Gregory G King<sup>1,2,3,6</sup> PhD MBChB

<sup>1</sup> Woolcock Institute of Medical Research, Camperdown, Sydney, Australia

<sup>2</sup> Cooperative Research Centre for Asthma, Camperdown, Sydney, Australia

<sup>3</sup> Department of Medicine, University of Sydney, NSW 2006, Australia

<sup>4</sup> Respiratory Division, Academic Hospital, Vrije Universiteit Brussels, 1090 Brussels, Belgium.

<sup>5</sup> Department of Allergy, Immunology, and Respiratory Medicine, The Alfred Hospital and Monash University, Melbourne, Australia

<sup>6</sup> Department of Respiratory Medicine, Royal North Shore Hospital, Sydney, Australia

Address Correspondence to:

Ms Sue Downie

Woolcock Institute of Medical Research

PO Box M77

Camperdown, NSW 2050

Australia

Ph: +61 2 9515 7524

Fax: + 61 2 9550 6115

sued@woolcock.org.au

## **Appendix 1 – Mathematical derivation of the MBNW indices $S_{\text{cond}}$ and $S_{\text{acin}}$**

$S_{\text{cond}}$  represents the ventilation heterogeneity within the conducting airways, and  $S_{\text{acin}}$  represents ventilation heterogeneity within the acinar airways. Both indices are derived from the normalized  $N_2$  slope curve, which is computed as follows. In each expiration of a MBNW test, the slope of the alveolar  $N_2$  phase III was determined, and divided by the corresponding mean expired nitrogen concentration to obtain a normalised slope ( $S_n$ ). The normalised slope of each breath was then plotted against the corresponding lung turnover (cumulative expired volume of that exhalation divided by the FRC). Figure 1 illustrates two such  $S_n$  curves, each one resulting from an averaging of  $S_n$  values collected from 3 MBW tests; the open symbols represent the average  $S_n$  plot of a normal subject and the closed symbols that of an asthma patient. It follows from theoretical considerations (1) that the  $S_n$  increase as a function of lung turnover over most of the  $S_n$  plot is essentially due to convection-related ventilation heterogeneity, and therefore  $S_{\text{cond}}$  is calculated as the regression slope between turnovers 1.5 and 6. The offset in the initial part of the  $S_n$  versus turnover plot is essentially due to diffusion-related ventilation heterogeneity, and  $S_{\text{acin}}$  is computed as the  $S_n$  value of the first breath minus the small contribution of the rate of  $S_n$  rise due to conductive airway ventilation heterogeneity (mean  $S_n$  of first breath -  $S_{\text{cond}} * \text{mean lung turnover of 1}^{\text{st}}$  breath). For the  $S_n$  plots in figure E1, corresponding values are  $S_{\text{cond}} = 0.02 \text{ L}^{-1}$  and  $S_{\text{acin}} = 0.05 \text{ L}^{-1}$  for the normal subject and  $S_{\text{cond}} = 0.152 \text{ L}^{-1}$  and  $S_{\text{acin}} = 0.172 \text{ L}^{-1}$  for the asthma patient.

**Figure E1:** Example of normalised slopes of an asthmatic (●) versus normal (○) subject.

**Appendix 2 – Description of healthy non-asthmatic subjects used in the Receiver Operator Characteristics (ROC) analysis for  $S_{\text{cond}}$**

17 healthy non-asthmatic subjects were recruited for the purpose of inclusion in the sensitivity and specificity (ROC) analysis undertaken for using  $S_{\text{cond}}$  as a predictor of AHR. The characteristics of these subjects are summarised in table E1.

**Table E1:** Baseline characteristics of the healthy non-asthmatic subjects included in the ROC sensitivity and specificity analysis. Values are means and (SD) unless otherwise stated.

|                                                                             | Healthy non-asthmatic subjects (n=17) |
|-----------------------------------------------------------------------------|---------------------------------------|
| <b>M/F</b>                                                                  | 6/11                                  |
| <b>Age (years) and (range)</b>                                              | 26.2 (19-40)                          |
| <b>Atopic Y/N</b>                                                           | 3/14                                  |
| <b><math>S_{\text{cond}}</math> (<math>\text{L}^{-1}</math>)</b>            | 0.019 (0.01)                          |
| <b><math>S_{\text{acin}}</math> (<math>\text{L}^{-1}</math>)</b>            | 0.094 (0.03)                          |
| <b>LCI (CEV/FRC)</b>                                                        | 7.02 (0.6)                            |
| <b>DRR (% fall <math>\text{FEV}_1/\mu\text{mol}</math> methacholine+3)*</b> | 3.34 (3.06 – 3.65)                    |
| <b><math>\text{FEV}_1</math> (% predicted)</b>                              | 101.6 (12.9)                          |
| <b><math>\text{FEV}_1/\text{FVC}</math> ratio</b>                           | 0.87 (0.05)                           |

\* Geometric mean and 95% CI

### **Methods**

In the healthy non-asthmatic subjects, a baseline MBNW test was performed as described in the methods of the manuscript. Following this, methacholine challenge was performed as described in the manuscript, and for this sensitivity and specificity analysis, response to the challenge was measured by the dose response ratio (DRR), calculated from the final dose as  $\% \text{fall FEV}_1 / \text{methacholine dose } (\mu\text{mol}) + 3$ . For the sensitivity and specificity analysis reported in the manuscript ( $n = 57$ ), the results from the 17 healthy non-asthmatic subjects were combined with the 40 asthmatic subjects from the main study (Figure 2 in manuscript).

### **Results**

**Figure E2** - Sensitivity and specificity of  $S_{\text{cond}}$  in predicting the presence or absence of AHR following treatment in the 18 asthmatics from the treatment sub-group

### **Appendix 3 – Repeatability study of the MBNW indexes $S_{cond}$ and $S_{acin}$**

In a cohort of 10 asthmatic and 11 healthy non-asthmatic subjects, the repeatability of the MBNW indices of  $S_{cond}$ ,  $S_{acin}$  and LCI were assessed. The eligibility criteria for these asthmatic and healthy non-asthmatic subjects were the same as described in the manuscript. The MBNW was performed on two separate days at approximately the same time of day, and the second day's visit was within 8 days of the first visit. The baseline characteristics of these subjects are described below in table E2. In the asthmatic subjects, a methacholine challenge was performed to assess AHR after the MBNW on one of the testing days. The methacholine challenge was performed as per outlined in the methods section of the manuscript.

**Table E2:** Baseline characteristics of the asthmatic and healthy non-asthmatic subjects included in the repeatability study. Values are means and SD unless otherwise stated

|                               | Asthmatic subjects<br>(n=10) | Healthy non-asthmatic<br>subjects (n=11) | p value# |
|-------------------------------|------------------------------|------------------------------------------|----------|
| M/F                           | 4/6                          | 4/7                                      |          |
| Age in years (range)          | 30.5 (22-42)                 | 37.6 (24-57)                             | 0.1      |
| % predicted FEV <sub>1</sub>  | 85.2 (17.9)                  | 102.6 (14.1)                             | 0.02     |
| AHR present/absent            | 8/2                          | -                                        |          |
| $S_{cond}$ (L <sup>-1</sup> ) | 0.054 (0.03)                 | 0.023 (0.01)                             | 0.001    |
| $S_{acin}$ (L <sup>-1</sup> ) | 0.134 (0.04)                 | 0.080 (0.02)                             | 0.001    |
| LCI (CEV/FRC)                 | 8.2 (0.9)                    | 6.6 (0.4)                                | <0.0001  |

# p value is for differences between mean values in asthmatic versus healthy non-asthmatic subjects

## **Results**

The intra-class correlation coefficients (ICC) for the MBNW indices of  $S_{\text{cond}}$ ,  $S_{\text{acin}}$  and LCI demonstrate a good repeatability of the indices, and the 95% limits of agreement for the variability of the indices are also reported (table E3).

**Table E3:** Repeatability and variability of the MBNW parameters  $S_{\text{cond}}$ ,  $S_{\text{acin}}$ , LCI and spirometry in 10 asthmatic and 11 healthy non-asthmatic subjects.

|                                                            | Asthmatic subjects<br>(n=10) | Healthy non-asthmatic<br>subjects (n=11) |
|------------------------------------------------------------|------------------------------|------------------------------------------|
| ICC for $S_{\text{cond}}$                                  | 0.84                         | 0.80                                     |
| ICC for $S_{\text{acin}}$                                  | 0.95                         | 0.78                                     |
| ICC for LCI                                                | 0.91                         | 0.70                                     |
| ICC for $FEV_1$                                            | 0.96                         | 0.99                                     |
| ICC for $FEF_{25-75\%}$                                    | 0.93                         | 0.91                                     |
| 95% limits of agreement for $S_{\text{cond}}$ ( $L^{-1}$ ) | $\pm 0.026$                  | $\pm 0.011$                              |
| 95% limits of agreement for $S_{\text{acin}}$ ( $L^{-1}$ ) | $\pm 0.027$                  | $\pm 0.022$                              |
| 95% limits of agreement for LCI (CEV/FRC)                  | $\pm 0.735$                  | $\pm 0.718$                              |
| 95% limits of agreement for $FEV_1$ (L)                    | $\pm 0.369$                  | $\pm 0.240$                              |
| 95% limits of agreement for $FEF_{25-75\%}$ (L/s)          | $\pm 0.662$                  | $\pm 0.765$                              |

## **References**

1. Crawford, A.B., Makowska, M., Paiva, M., and Engel, L.A. 1985. Convection- and diffusion-dependent ventilation maldistribution in normal subjects. *Journal of Applied Physiology* 59:838-846.
